# Supplementary material for: Real-World Safety, Effectiveness, and Patient-Reported Outcomes in Patients with Chronic Hepatitis C Virus Infection Treated with Glecaprevir/Pibrentasvir: Updated Data from the German Hepatitis C-Registry (DHC-R)
Source: MDPI journal article supplement (doi:10.3390/v14071541), 2022-07-14
Supplement: s1 [file s1]

**Table S1.** Comedication during HCV therapy in >3% patients (ATC Level 4, chemical subgroup).

|                                                                     | ITT total % |
|---------------------------------------------------------------------|-------------|
| N07BC: Drugs used in opioid dependence                              | 25.9%       |
| C07AB: Beta blocking agents, selective                              | 6.1%        |
| N02AE: Oripavine derivatives                                        | 5.7%        |
| C09AA: ACE inhibitors, plain                                        | 5.7%        |
| A02BC: Proton pump inhibitors                                       | 5.6%        |
| H03AA: Thyroid hormones                                             | 4.4%        |
| C08CA: Dihydropyridine derivatives                                  | 4.0%        |
| M02AA: Anti-inflammatory preparations, non-steroids for topical use | 3.9%        |
| M01AE: Propionic acid derivatives                                   | 3.7%        |
| A11CC: Vitamin D and analogues                                      | 3.7%        |
| B01AC: Platelet aggregation inhibitors excl. heparin                | 3.6%        |
| G02CC: Anti-inflammatory products for vaginal administration        | 3.5%        |
| N02BA: Salicylic acid and derivatives                               | 3.5%        |
| A01AD: Other agents for local oral treatment                        | 3.5%        |
| N06AX: Other antidepressants                                        | 3.4%        |

ATC, Anatomic Therapeutic Chemical; ACE, angiotensin-converting enzyme.

**Table S2.** Overlap between OST or active drug use, and other populations of special interest (total population).

| Combination of subgroups                                    | Number of patients<br>(N = 2354) |
|-------------------------------------------------------------|----------------------------------|
| OST + alcohol use                                           | 71                               |
| OST + active drug use                                       | 69                               |
| OST + psychiatric comorbidity                               | 122                              |
| Alcohol use + PWUD (active)                                 | 22                               |
| Alcohol use + psychiatric comorbidity                       | 46                               |
| PWUD (active) + psychiatric comorbidity                     | 27                               |
| OST + alcohol use + PWUD (active)                           | 16                               |
| OST + alcohol use + psychiatric comorbidity                 | 20                               |
| Alcohol use + PWUD (active) + psychiatric comorbidity       | 6                                |
| OST + alcohol use + PWUD (active) + psychiatric comorbidity | 4                                |
| Migrants + PWUD (active)                                    | 26                               |
| CIS-migrants + PWUD (active)                                | 12                               |
| Migrants + OST                                              | 191                              |
| CIS-migrants + OST                                          | 105                              |
| Migrants + PWUD (active) + OST                              | 24                               |
| CIS-migrants + PWUD (active) + OST                          | 11                               |

CIS, Commonwealth of Independent States; OST, opioid substitution therapy; PWUD (active), people who actively use drugs.

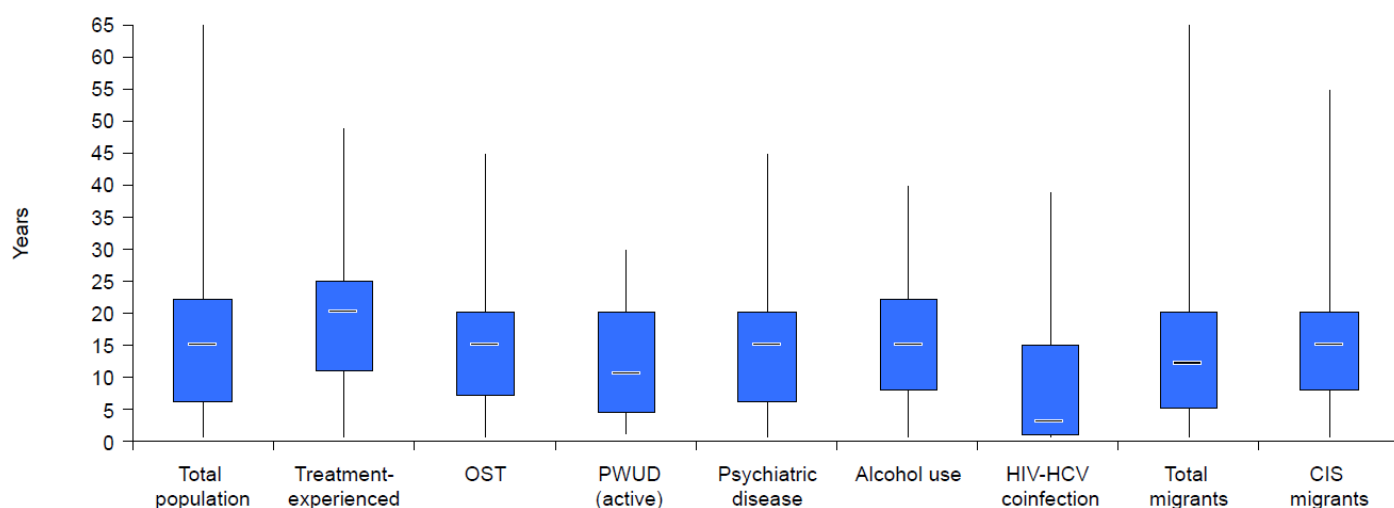

**Figure S1.** Estimated length of HCV infection.

Data are median (IQR) with min and max values. CIS, Commonwealth of Independent States; HIV, human immunodeficiency virus; OST, opioid substitution therapy; PWUD (active), people who actively use drugs.

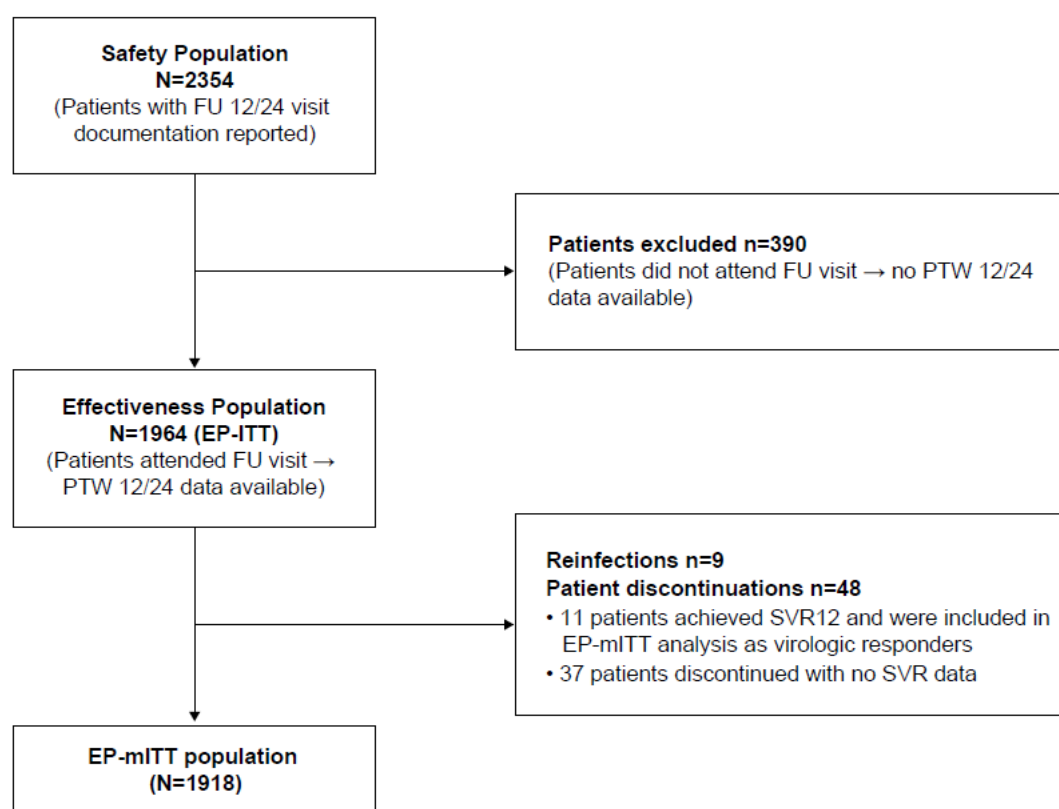

**Figure S2.** Patient disposition.

EP-ITT, intention-to-treat in the effectiveness population; EP-mITT, modified ITT in the effectiveness population FU, follow-up; PTW, post-treatment week; SVR12, sustained virologic response at post-treatment Week 12

A

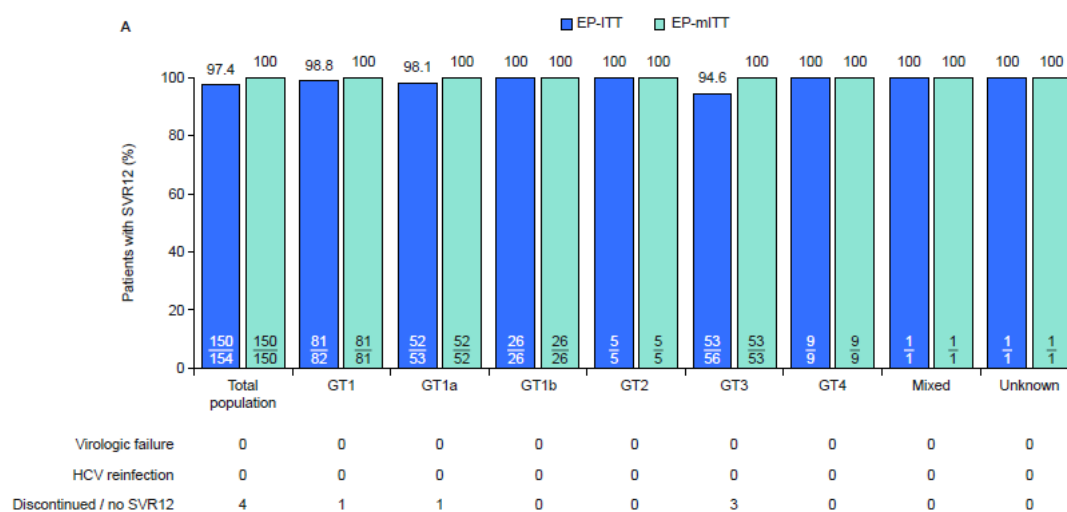

B

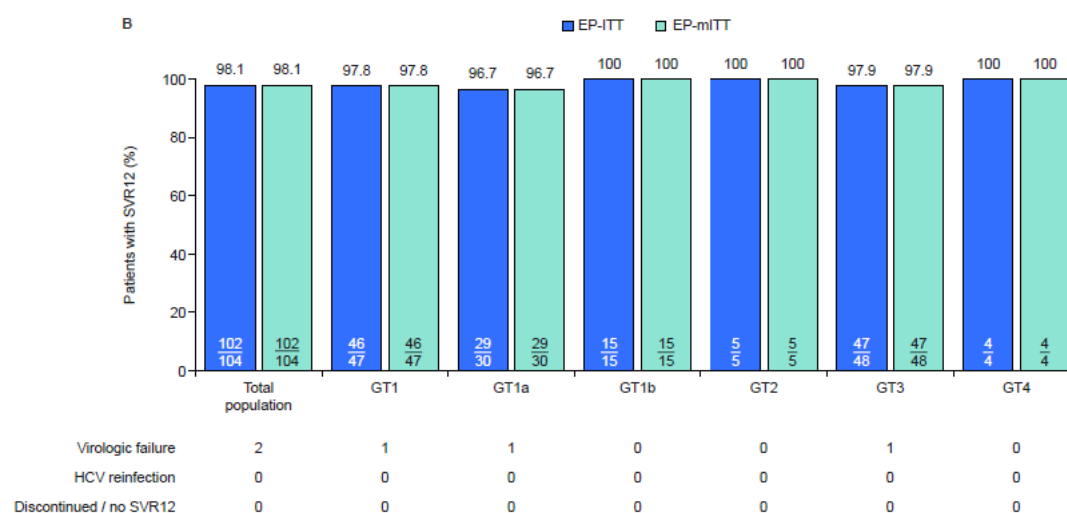

**Figure S3.** SVR12 rates in treatment-naïve patients with CC by genotype for (A) 8-week treatment with G/P and (B) 12-week treatment with G/P.

CC, compensated cirrhosis; G/P, glecaprevir/pibrentasvir; GT, genotype; HCV, hepatitis C virus; ITT, intention to treat; mITT, modified ITT; SVR, sustained virologic response at post-treatment Week 12.

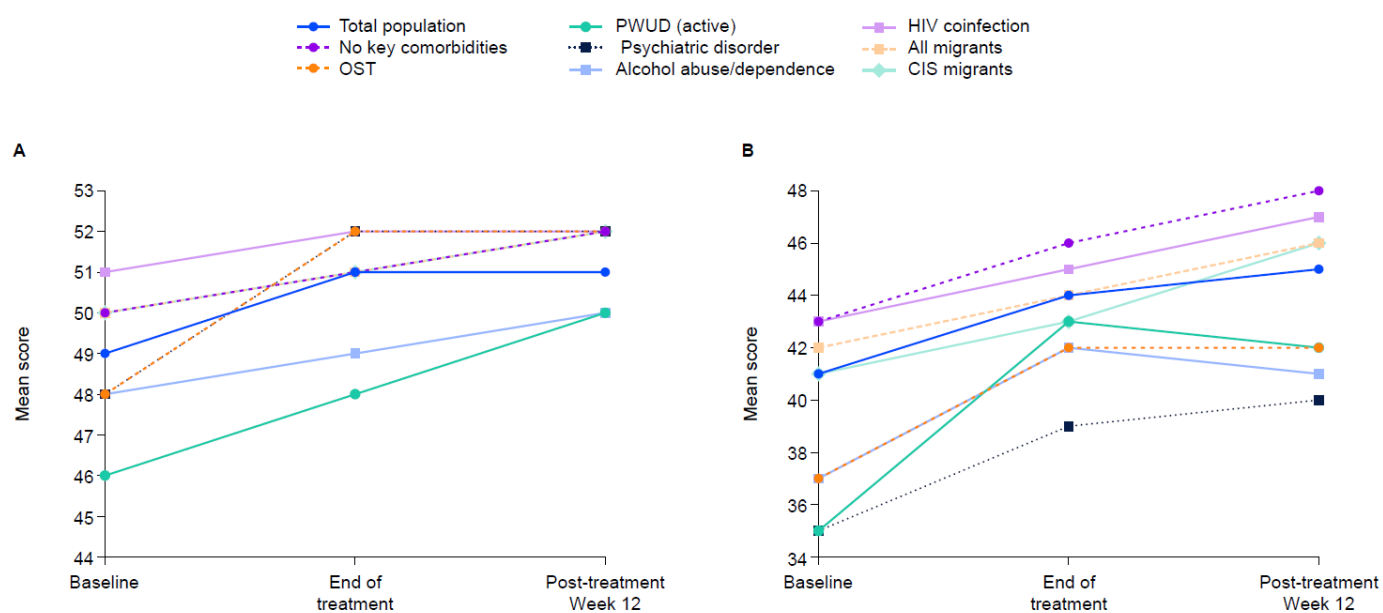

**Figure S4.** Mean SF-36 scores from baseline to PTW12 (A) Physical component summary score (B) Mental component summary score.

CIS, Commonwealth of Independent States; HCV, hepatitis C virus; HIV, human immunodeficiency virus; OST, opioid substitution therapy; PWUD (active), people who actively use drugs.

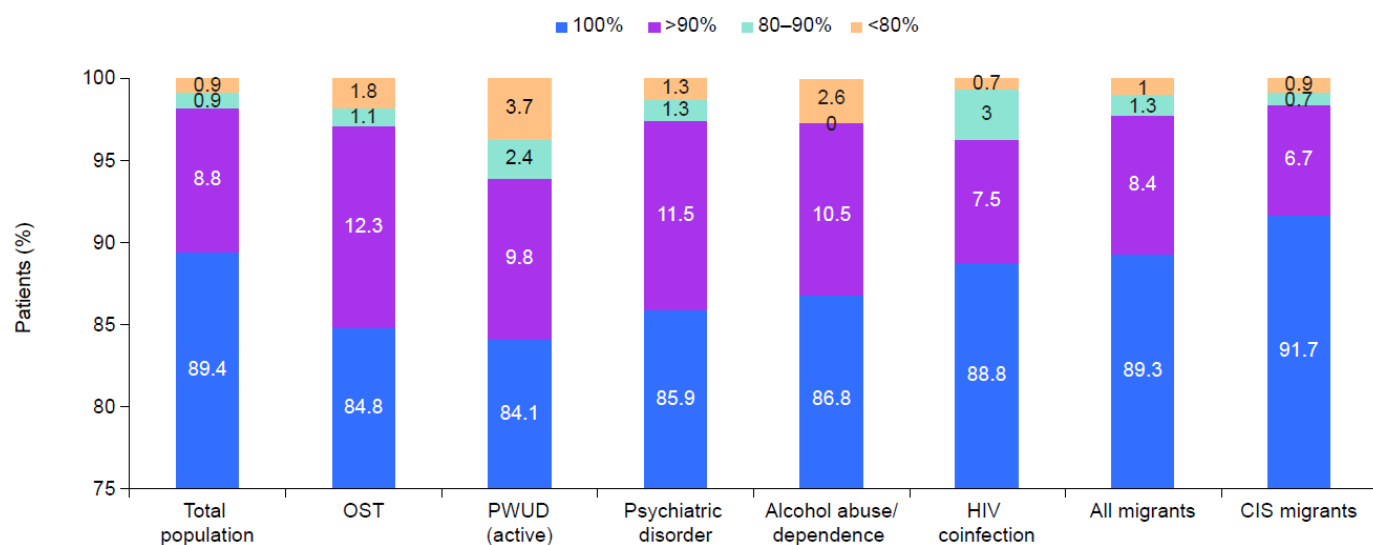

**Figure S5.** Compliance of patients who completed treatment, as judged by physicians at the end of therapy.

CIS, Commonwealth of Independent States; HIV, human immunodeficiency virus; OST, opioid substitution therapy; PWUD (active), people who actively use drugs.
